# Supplementary material for: Optimal dosing for psilocybin pharmacotherapy: Considering weight-adjusted and fixed dosing approaches
Source: PubMed Central journal article supplement — J Psychopharmacol. 2021 Feb 20;35(4):353–61. doi: 10.1177/0269881121991822 (PMC8056712; doi:10.1177/0269881121991822), 2021-02-20
Supplement: sj-pdf-1-jop-10.1177_0269881121991822.pdf [file sj-pdf-1-jop-10.1177_0269881121991822.pdf]

## Supplemental Materials

Note: Models including dummy codes for race or ethnicity were not specified, as the frequencies of each non-white identity were so low – out of a total of 103 volunteers for the 23-27 mg analysis, Asian  $n = 2$ , unknown = 9, and Hispanic = 2.

**Table SA.** Multivariate regression analysis results for participants who received 23 to 27 mg (inclusive) psilocybin ( $n = 103$ ) including BMI instead of weight, demonstrating no statistically significant relationships between psilocybin subjective effects and demographic variables.

|             | Estimate | Std.Err | z-value | p-value |
|-------------|----------|---------|---------|---------|
| MEQ30 total |          |         |         |         |
| age         | -0.002   | 0.002   | -0.898  | 0.369   |
| race        | -0.062   | 0.067   | -0.916  | 0.360   |
| sex         | -0.029   | 0.046   | -0.638  | 0.523   |
| BMI         | 0.005    | 0.007   | 0.705   | 0.481   |
| CEQ total   |          |         |         |         |
| age         | -0.001   | 0.001   | -0.915  | 0.360   |
| race        | 0.039    | 0.052   | 0.751   | 0.452   |
| sex         | -0.077   | 0.036   | -2.172  | 0.030   |
| BMI         | 0.006    | 0.005   | 1.130   | 0.258   |
| Intensity   |          |         |         |         |
| age         | -0.007   | 0.008   | -0.944  | 0.345   |
| race        | 0.075    | 0.293   | 0.257   | 0.797   |
| sex         | -0.221   | 0.200   | -1.108  | 0.268   |
| BMI         | 0.024    | 0.030   | 0.817   | 0.414   |

Note: MEQ30 = Mystical Experience Questionnaire; CEQ = Challenging Experience Questionnaire.

**Table SB.** Multivariate regression analysis results for participants who received 23 to 27 mg (inclusive) psilocybin ( $n = 103$ ) including dummy codes for study. No studies showed statistically significant relationships between psilocybin subjective effects and demographic variables.

|                        | Estimate | Std.Err | z-value | p-value |
|------------------------|----------|---------|---------|---------|
| MEQ30 total            |          |         |         |         |
| age                    | 0.000    | 0.002   | 0.207   | 0.836   |
| race                   | 0.011    | 0.079   | 0.140   | 0.888   |
| sex                    | -0.022   | 0.045   | -0.482  | 0.630   |
| weight (kg)            | 0.010    | 0.017   | 0.572   | 0.567   |
| Griffiths et al., 2011 | -0.058   | 0.134   | -0.436  | 0.663   |
| Griffiths et al., 2016 | -0.248   | 0.132   | -1.881  | 0.060   |
| Johnson et al., 2014   | -0.315   | 0.122   | -2.588  | 0.010   |
| Griffiths et al., 2018 | -0.107   | 0.114   | -0.939  | 0.348   |
| NCT02145091            | -0.161   | 0.120   | -1.342  | 0.180   |
| Carbonaro et al., 2018 | -0.150   | 0.137   | -1.094  | 0.274   |
| NCT02243813            | -0.087   | 0.150   | -0.583  | 0.560   |
| Davis et al., 2020     | -0.347   | 0.165   | -2.102  | 0.036   |
| Barrett et al., 2020   | -0.098   | 0.150   | -0.652  | 0.514   |
| CEQ total              |          |         |         |         |
| age                    | -0.002   | 0.002   | -1.620  | 0.105   |
| race                   | 0.002    | 0.064   | 0.024   | 0.981   |
| sex                    | -0.079   | 0.036   | -2.179  | 0.029   |
| weight (kg)            | 0.002    | 0.014   | 0.138   | 0.890   |
| Griffiths et al., 2011 | 0.165    | 0.108   | 1.529   | 0.126   |
| Griffiths et al., 2016 | 0.077    | 0.106   | 0.727   | 0.467   |
| Johnson et al., 2014   | 0.102    | 0.098   | 1.039   | 0.299   |
| Griffiths et al., 2018 | 0.054    | 0.092   | 0.592   | 0.554   |
| NCT02145091            | 0.044    | 0.096   | 0.459   | 0.646   |
| Carbonaro et al., 2018 | -0.079   | 0.110   | -0.714  | 0.475   |
| NCT02243813            | 0.233    | 0.121   | 1.936   | 0.053   |
| Davis et al., 2020     | 0.162    | 0.133   | 1.221   | 0.222   |
| Barrett et al., 2020   | 0.029    | 0.121   | 0.236   | 0.813   |
| Intensity              |          |         |         |         |
| age                    | -0.001   | 0.008   | -0.172  | 0.864   |
| race                   | 0.244    | 0.337   | 0.682   | 0.495   |
| sex                    | -0.148   | 0.203   | -0.728  | 0.466   |
| weight (kg)            | 0.009    | 0.078   | 0.112   | 0.911   |
| Griffiths et al., 2011 | 0.173    | 0.604   | 0.287   | 0.774   |
| Griffiths et al., 2016 | -0.703   | 0.595   | -1.182  | 0.237   |
| Johnson et al., 2014   | -0.845   | 0.547   | -1.544  | 0.123   |
| Griffiths et al., 2018 | -0.397   | 0.515   | -0.771  | 0.440   |
| NCT02145091            | -0.030   | 0.540   | -0.056  | 0.955   |
| Carbonaro et al., 2018 | -0.122   | 0.616   | -0.197  | 0.844   |
| NCT02243813            | -0.380   | 0.675   | -0.563  | 0.573   |
| Davis et al., 2020     | -1.044   | 0.744   | -1.403  | 0.161   |
| Barrett et al., 2020   | -0.472   | 0.676   | -0.698  | 0.485   |

Note: MEQ30 = Mystical Experience Questionnaire; CEQ = Challenging Experience Questionnaire. The Griffiths et al., 2006 study is the reference category. NCT02145091 is a study in meditation practitioners with a long-term daily practice. NCT02243813 is a study in religious professionals.

**Table SC.** Multivariate regression analysis results for participants who received 20 mg/70 kg psilocybin ( $n = 123$ ) including dummy codes for study. One study showed a statistically significant relationship between psilocybin subjective effects and demographic variables.

|                        | Estimate      | Std.Err      | z-value       | p-value      |
|------------------------|---------------|--------------|---------------|--------------|
| MEQ30 total            |               |              |               |              |
| age                    | -0.002        | 0.002        | -0.947        | 0.344        |
| race                   | 0.036         | 0.069        | 0.518         | 0.604        |
| sex                    | -0.030        | 0.052        | -0.583        | 0.560        |
| adjusted dose (mg)     | 0.007         | 0.007        | 1.065         | 0.287        |
| Johnson et al., 2014   | -0.128        | 0.080        | -1.601        | 0.109        |
| Griffiths et al., 2018 | 0.002         | 0.064        | 0.025         | 0.980        |
| Carbonaro et al., 2018 | -0.189        | 0.082        | -2.294        | 0.022        |
| NCT02243813            | 0.057         | 0.085        | 0.671         | 0.503        |
| Davis et al., 2020     | -0.106        | 0.099        | -1.076        | 0.282        |
| CEQ total              |               |              |               |              |
| age                    | -0.003        | 0.001        | -1.817        | 0.069        |
| race                   | 0.039         | 0.049        | 0.787         | 0.431        |
| sex                    | -0.068        | 0.037        | -1.846        | 0.065        |
| adjusted dose (mg)     | 0.005         | 0.005        | 1.044         | 0.296        |
| Johnson et al., 2014   | 0.011         | 0.057        | 0.199         | 0.843        |
| Griffiths et al., 2018 | -0.038        | 0.045        | -0.831        | 0.406        |
| Carbonaro et al., 2018 | <b>-0.188</b> | <b>0.058</b> | <b>-3.227</b> | <b>0.001</b> |
| NCT02243813            | -0.066        | 0.060        | -1.095        | 0.274        |
| Davis et al., 2020     | 0.024         | 0.070        | 0.339         | 0.735        |
| Intensity              |               |              |               |              |
| age                    | -0.009        | 0.008        | -1.188        | 0.235        |
| race                   | 0.434         | 0.263        | 1.650         | 0.099        |
| sex                    | -0.162        | 0.198        | -0.817        | 0.414        |
| adjusted dose (mg)     | 0.021         | 0.026        | 0.808         | 0.419        |
| Johnson et al., 2014   | -0.303        | 0.305        | -0.993        | 0.321        |
| Griffiths et al., 2018 | -0.126        | 0.244        | -0.518        | 0.605        |
| Carbonaro et al., 2018 | 0.541         | 0.314        | -1.722        | 0.085        |
| NCT02243813            | -0.255        | 0.322        | -0.792        | 0.428        |
| Davis et al., 2020     | -0.320        | 0.376        | -0.850        | 0.395        |

Note: MEQ30 = Mystical Experience Questionnaire; CEQ = Challenging Experience Questionnaire. The Griffiths et al., 2011 study is the reference category. NCT02243813 is a study of psilocybin in religious professionals. Statistically significant effects after Bonferroni correction are indicated in bold.

**Table SD.** Multivariate regression analysis results for participants who received 30 mg/70 kg psilocybin ( $n = 193$ ) including dummy codes for study. One study showed a statistically significant relationship between psilocybin subjective effects and demographic variables.

|                        | Estimate     | Std.Err      | z-value       | p-value      |
|------------------------|--------------|--------------|---------------|--------------|
| <b>MEQ30 total</b>     |              |              |               |              |
| age                    | -0.003       | 0.002        | -0.947        | 0.344        |
| race                   | 0.001        | 0.069        | 0.518         | 0.604        |
| sex                    | 0.011        | 0.052        | -0.583        | 0.560        |
| adjusted dose (mg)     | 0.001        | 0.007        | 1.065         | 0.287        |
| Griffiths et al., 2011 | -0.012       | 0.080        | -1.601        | 0.109        |
| Johnson et al., 2014   | -0.118       | 0.080        | -1.601        | 0.109        |
| Griffiths et al., 2018 | -0.092       | 0.064        | 0.025         | 0.980        |
| Carbonaro et al., 2018 | -0.196       | 0.082        | -2.294        | 0.022        |
| NCT02243813            | -0.114       | 0.085        | 0.671         | 0.503        |
| Davis et al., 2020     | -0.003       | 0.099        | -1.076        | 0.282        |
| <b>CEQ total</b>       |              |              |               |              |
| age                    | -0.003       | 0.002        | -1.893        | 0.058        |
| race                   | 0.002        | 0.052        | 0.025         | 0.980        |
| sex                    | 0.000        | 0.039        | 0.276         | 0.783        |
| adjusted dose (mg)     | 0.001        | 0.003        | 0.263         | 0.792        |
| Griffiths et al., 2011 | 0.019        | 0.072        | -0.162        | 0.871        |
| Johnson et al., 2014   | -0.028       | 0.062        | -1.904        | 0.057        |
| Griffiths et al., 2018 | -0.064       | 0.053        | -1.728        | 0.084        |
| Carbonaro et al., 2018 | -0.212       | 0.079        | -2.487        | 0.013        |
| NCT02243813            | -0.164       | 0.094        | -1.222        | 0.222        |
| Davis et al., 2020     | 0.063        | 0.107        | -0.027        | 0.979        |
| <b>Intensity</b>       |              |              |               |              |
| age                    | -0.009       | 0.001        | -2.519        | 0.012        |
| race                   | 0.434        | 0.036        | 0.042         | 0.967        |
| sex                    | -0.162       | 0.027        | -0.016        | 0.987        |
| adjusted dose (mg)     | 0.021        | 0.002        | 0.400         | 0.689        |
| Griffiths et al., 2011 | -0.128       | 0.050        | 0.379         | 0.705        |
| Johnson et al., 2014   | -0.303       | 0.043        | -0.660        | 0.509        |
| Griffiths et al., 2018 | -0.126       | 0.037        | -1.755        | 0.079        |
| Carbonaro et al., 2018 | <b>0.541</b> | <b>0.055</b> | <b>-3.886</b> | <b>0.000</b> |
| NCT02243813            | -0.255       | 0.065        | -2.536        | 0.011        |
| Davis et al., 2020     | -0.320       | 0.074        | 0.848         | 0.396        |

Note: MEQ30 = Mystical Experience Questionnaire; CEQ = Challenging Experience Questionnaire. The Griffiths et al., 2006 study is the reference category. NCT02243813 is a study of psilocybin in religious professionals. Statistically significant effects after Bonferroni correction are indicated in bold.
